# Supplementary material for: Identifying and Characterizing Types of Balance Recovery Strategies Among Females and Males to Prevent Injuries in Free-Standing Public Transport Passengers
Source: Front Bioeng Biotechnol. 2021 Jul 5;9:670498. doi: 10.3389/fbioe.2021.670498 (PMC8287834; doi:10.3389/fbioe.2021.670498)

**Appendix 1. Identified balance recovery strategies for each perturbation trial. The overall initial and recovery strategies are also tabulated. Abbreviations: an – ankle, kn – knee, hi – hip, sp – step, fi – fighting stance, sq – squat, su – surfer, n.a. – not applicable.**

| **Volunteers** | ***Lowest braking*** | | ***Baseline*** | | ***Highest Jerk*** | | ***Highest Acceleration*** | | ***Highest Braking*** | | **Initial** | **Recovery** |
| --- | --- | --- | --- | --- | --- | --- | --- | --- | --- | --- | --- | --- |
| **F** | **R** | **F** | **R** | **F** | **R** | **F** | **R** | **F** | **R** | **Strategy** | **Strategy** |
| 1 (M) | An|n.a. | Kn-An | Fi | Kn-An|Fi | An|Sp* | Kn-An|Sp | An|Sp* | Kn-An|Sp* | An|Sp* | Kn-An|Fi | An-Hi|Sp* | An-Kn | Step |
| 2 (M) | An-Hi|n.a. | An|Sp* | An|Sp* | An|Sp* | An|Sp* | An|Sp* | An|Sp* | An|Sp* | n.a. | n.a. | Ankle | Step |
| 3 (M) | An|n.a. | An|Sp | An-Kn|Sp | An|Sp* | An-Kn |Sp | An|Fi | An-Kn |Sp* | An|Sp* | n.a. | n.a. | Ankle | Step |
| 4 (F) | An|Sp | An|Sp | An|Sp | An|Sp | An-Hi|Fi | An|Fi | An-Kn|Sp* | An|Sp* | An-Kn|Sp | An|Sp* | Ankle | Step |
| 5 (F) | An|Sp | An|Sp* | An|Sp* | An|Sp* | An|Sp* | An|Sp* | An|Sp* | An|Sp* | An|Sp* | An|Sp* | Ankle | Step |
| 6 (F) | An|Kn | Kn-An|Sp | An-Kn|Sp | An|Sp | An-Kn|Fi | An|Sp | An-Kn|Sp* | An|Sp* | An-Kn|Sp | An|Sp | An-Kn | Step |
| 7 (M) | An|Sp | An|Fi | An|Fi | An|Fi | An|Fi | An|Fi | An|Sp* | An|Fi* | An|Fi | An|Fi | Ankle | Fight |
| 8 (F) | An|n.a. | An|Sp | An|Fi | An|Sp | An|Fi | An|Sp | An|Sp* | An|Sp* | An|Fi | An|Sp* | Ankle | Step |
| 9 (F) | Kn-An|n.a. | An|Sp | An|Fi | An|Fi | Hi-An|Fi | An|Fi | Kn-An|Sp* | An-Kn|Fi* | An|Fi | An|Fi | Ankle | Fight |
| 10 (F) | An|Sp | An|Sp* | An|Sp* | An|Sp* | An|Sp* | n.a. | An|Sp* | n.a. | n.a. | n.a. | Ankle | Step |
| 11 (M) | Kn|Kn | An|Fi | An-Hi|Fi | An|Fi | An-Hi|Fi | An|Fi | An-Kn|Sp | An|Fi* | An-Kn|Fi | An|Sp* | Ankle | Fight |
| 12 (M) | An-Kn|Fi | An|Fi | An-Kn|Fi | An|Fi | An-Kn|Fi | An|Fi | An-Kn|Fi | Kn-An|Fi* | An-Kn|Fi | Kn-An|Fi | An-kn | Fight |
| 13 (F) | An-Hi(?)|Sp | Hi-An|Sp | An|Sp | An|Sp | An|Sp | An|Sp | An|Sp* | An|Sp* | An|Sp | Hi|Fi | Ankle | Step |
| 14 (F) | An-Sp | An-Hi|Sp | An|Sp* | An|Sp* | An|Sp* | An|Sp* | An|Sp* | An|Sp* | n.a. | n.a. | Ankle | Step |
| 15 (F) | Kn-Kn | Hi-An-Kn|Sp | An|Fi | Hi|Fi | An|Fi | An|Fi | An|Sp* | An|Sp* | n.a. | n.a. | Ankle | Fight |
| 16 (F) | An-Fi | Kn-Sp|Fi | An-Kn|Fi | An|Fi | An|Fi | An|Fi | An-Kn|Sp* | An-Hi|Sp* | Kn|Fi | Kn|Fi* | Ankle | Fight |
| 17 (M) | - | An|Fi | An|Fi | An|Fi | An|Fi | An|Fi | An|Sp* | An|Sp* | An|Fi | An|Fi | Ankle | Fight |
| 18 (M) | Sp|Fi | Sp|Fi | An-Sp|Fi | An|Fi | An|Fi | An|Fi | An|Fi | An|Fi* | An|Fi | An-Kn|Fi | Ankle | Fight |
| 19 (M) | Hi-An|Sp* | Sq|Su* | An|Su | An|Su | An|Su | An|Su | Kn-An|Su* | An|Su* | An|Su | -|Su* | Ankle | Surfer |
| 20 (M) | An|Fi | An|Fi | An|Fi | An|Fi | An|Fi | An|Fi | An|Fi* | An|Sp* | An|Sp | An|Sp* | Ankle | Fight |
| 21 (M) | An|Fi | An|Sp* | An|Sp | An|Sp* | An|Sp | An|Sp* | An|Sp* | An|Sp* | An|Sp* | An|Sp* | Ankle | Step |
| 22 (M) | An|Sp | An|Sp* | An|Sp* | An|Sp* | An-Kn|Sp* | An|Sp* | An|Sp* | An|Sp* | An-Kn|Sp* | An|Sp* | Ankle | Step |
| 23 (M) | An|Sp | An|Sp | An|Fi | An|Fi | An|Fi | An|Fi | An|Fi* | An|Fi* | An|Fi | An|Fi | Ankle | Fight |
| 24 (F) | An|Fi | An|Sp | n.a. | Hi-Kn|Sq-Sp | Hi|Sq-sp | An|Sq-sp | Hi|Sq-sp | An|Sq-sp | n.a. | n.a. | Ankle | Squat-step |

**Appendix 2. Fighting stance variations among volunteers.**


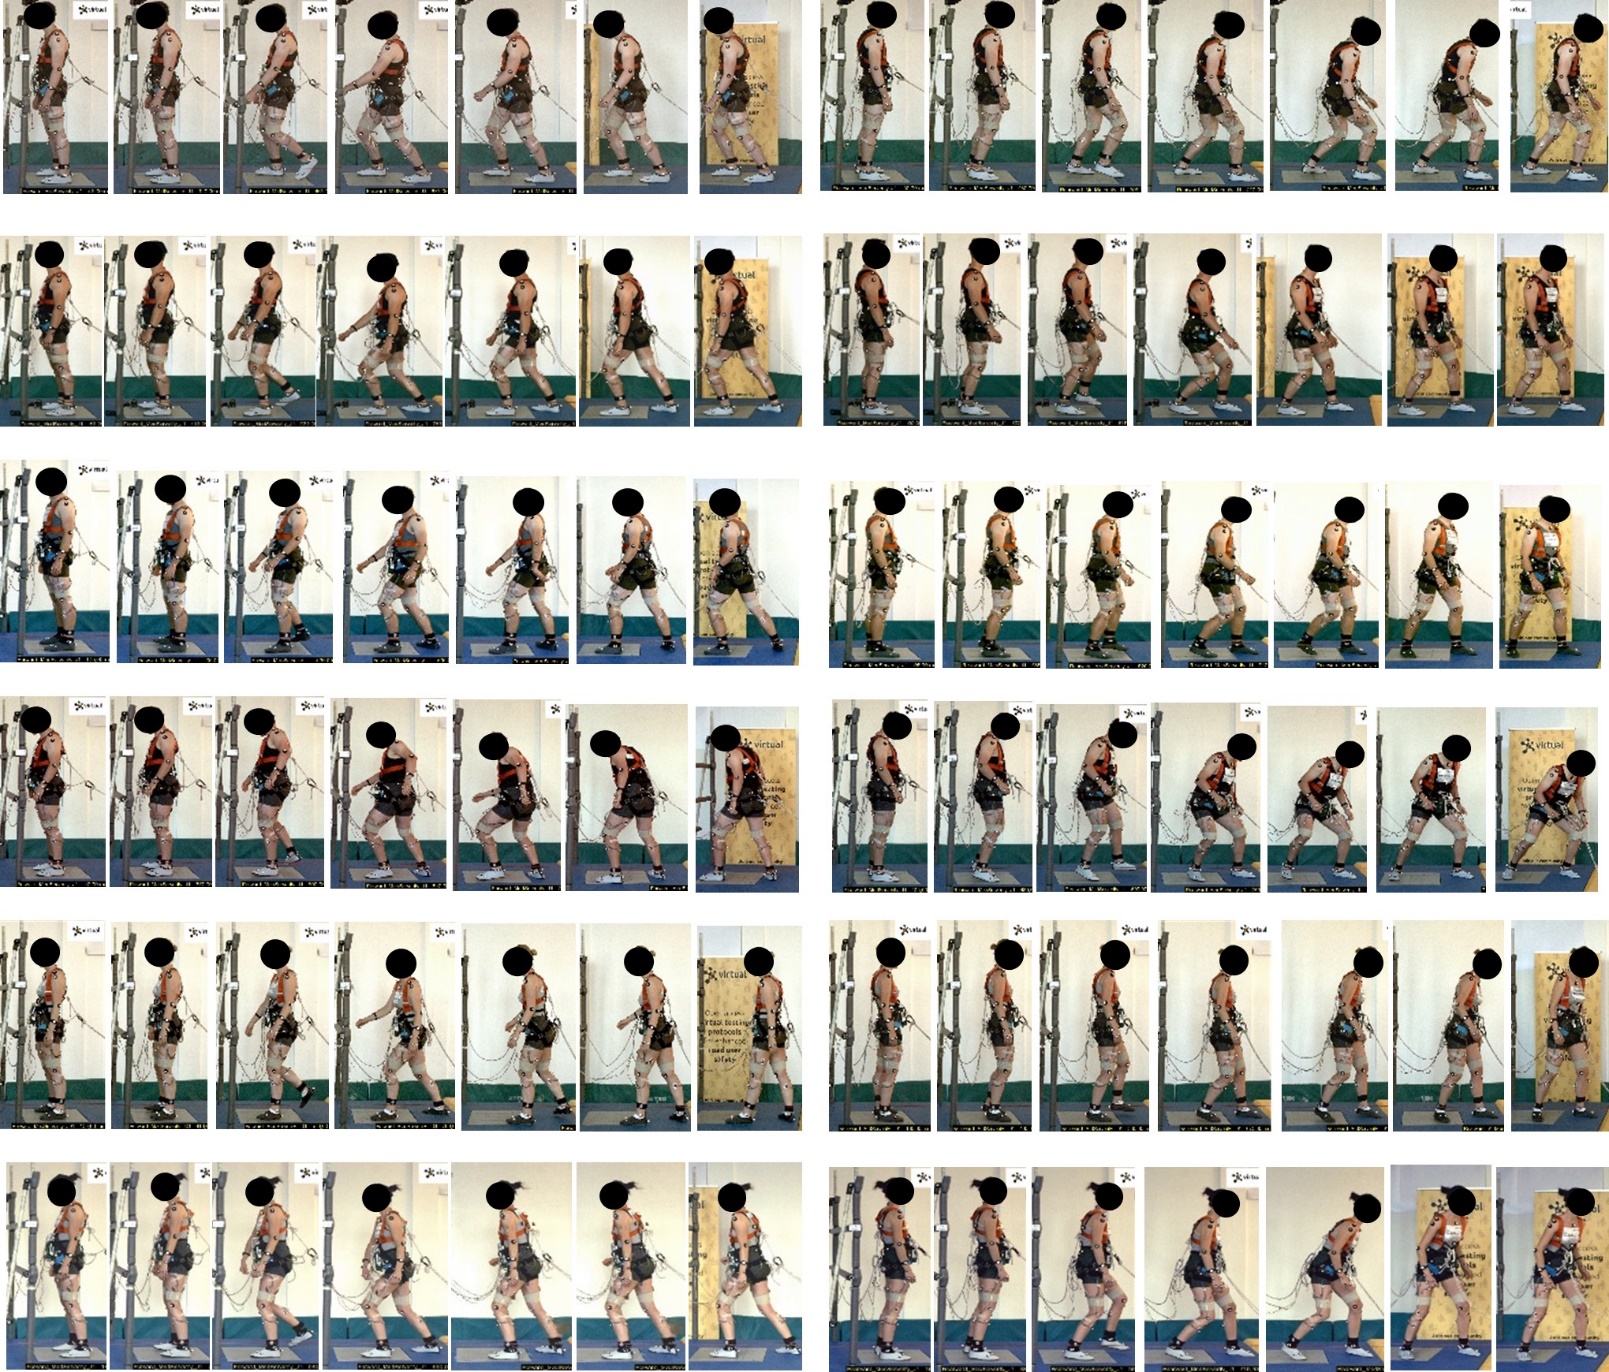


**Appendix 3. Stepping variations among volunteers.**


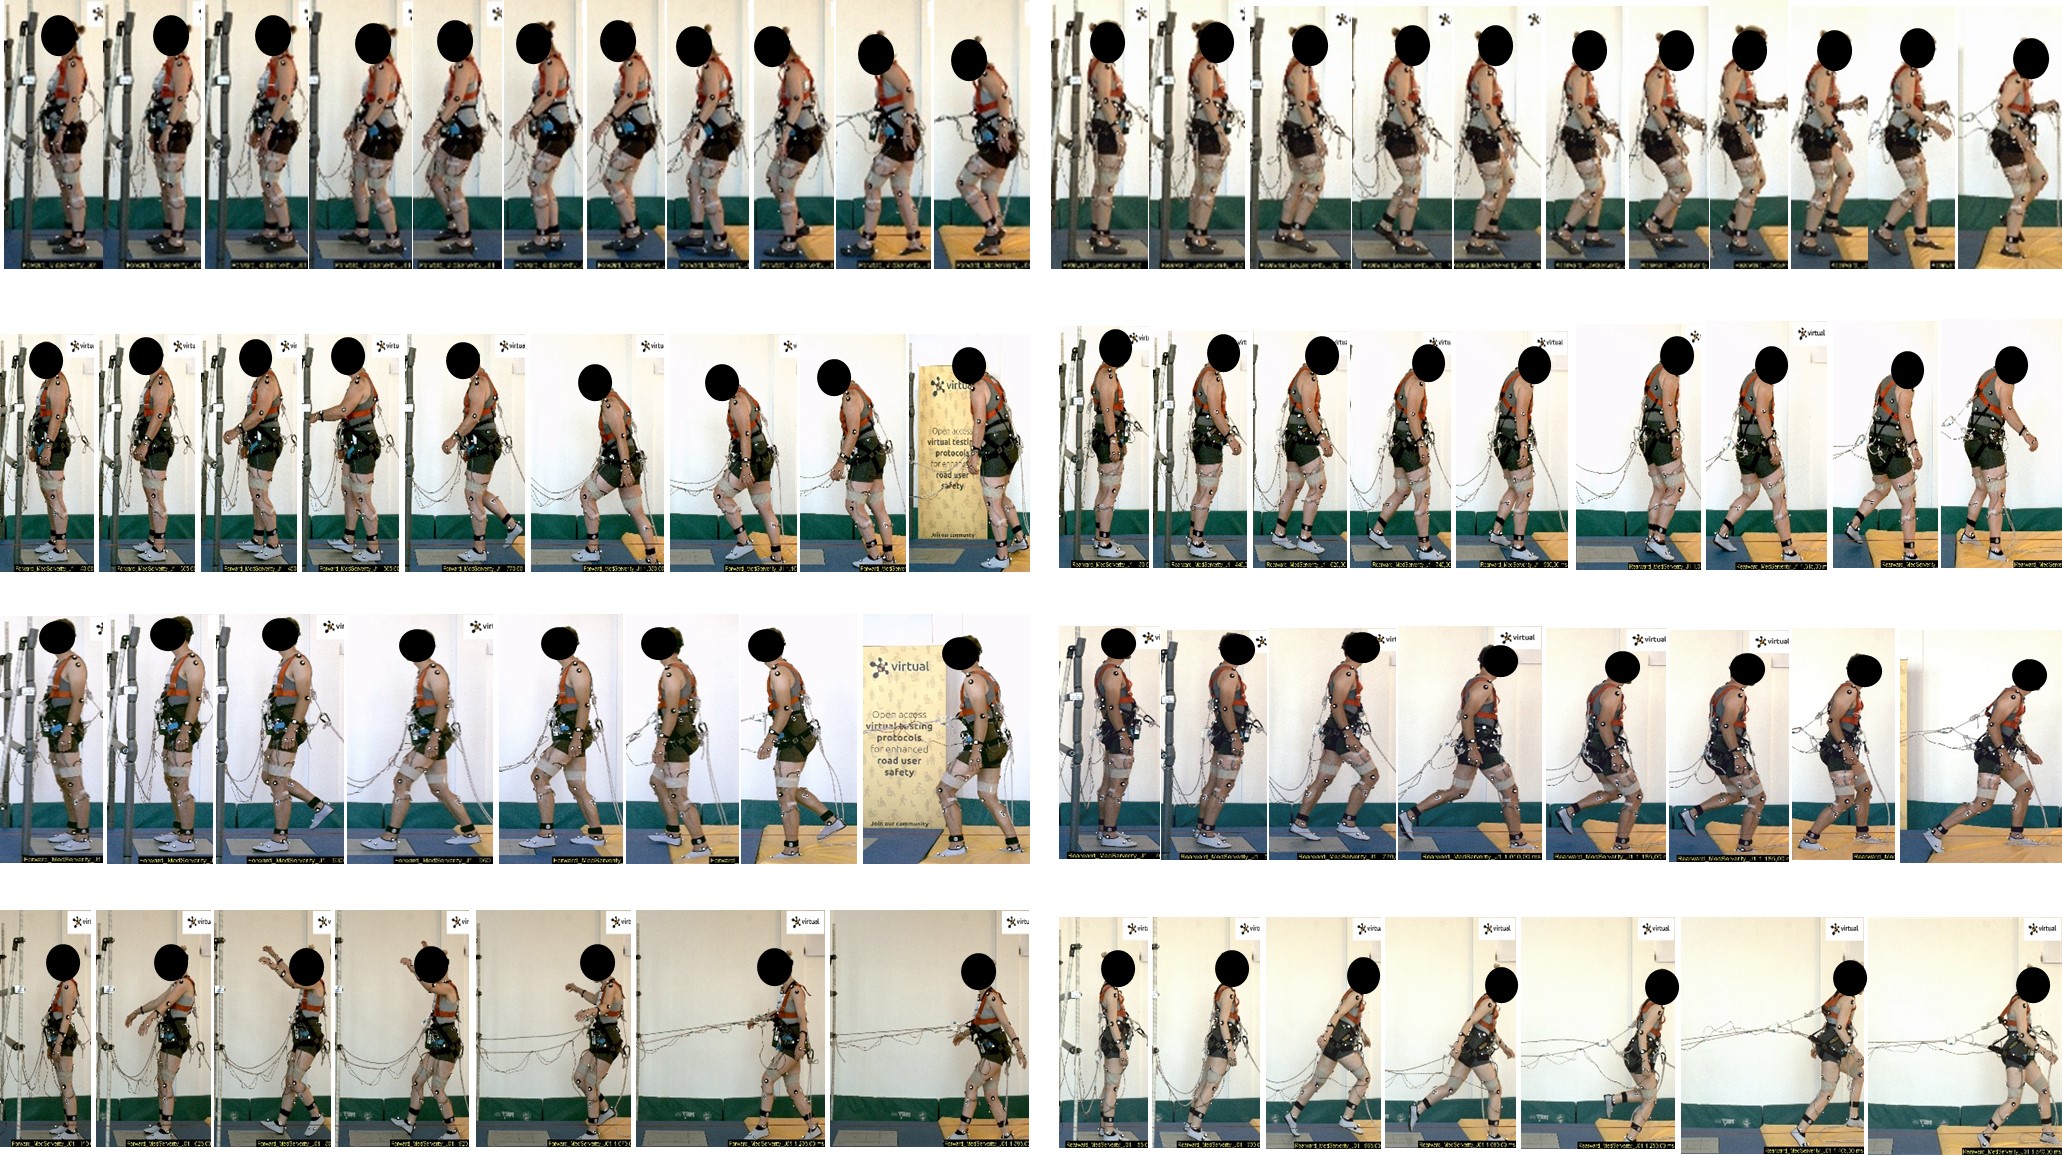

Supplement: Supplementary file 1 [file Data_Sheet_1.docx]
